# Supplementary material for: HCC: RNA-Sequencing in Cirrhosis
Source: MDPI journal article supplement (doi:10.3390/biom13010141), 2023-01-10
Supplement: s1 [file s1]

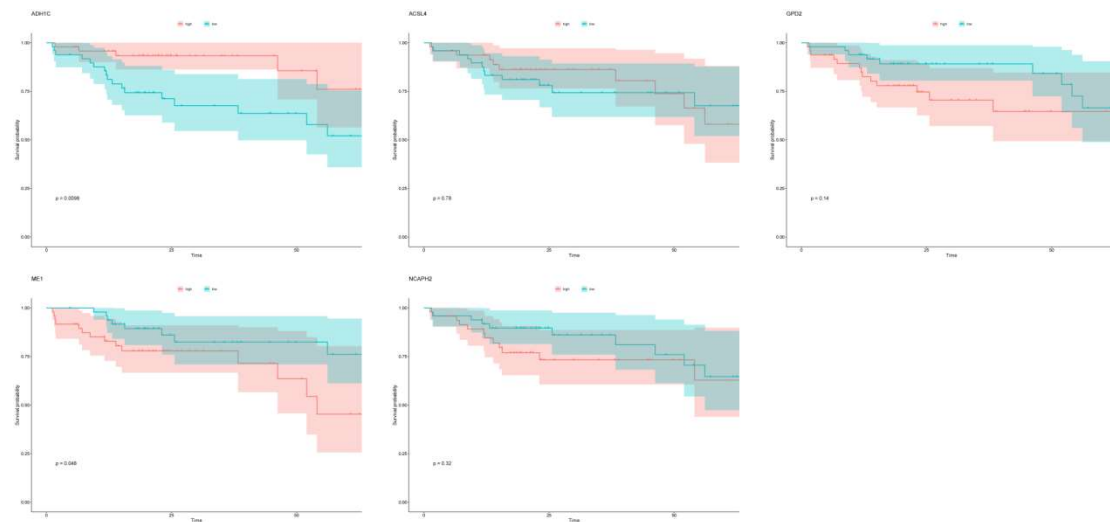

**Figure S1:** Kaplan-Meier survival curves of the 5 genes in FAM-related prognostic signature

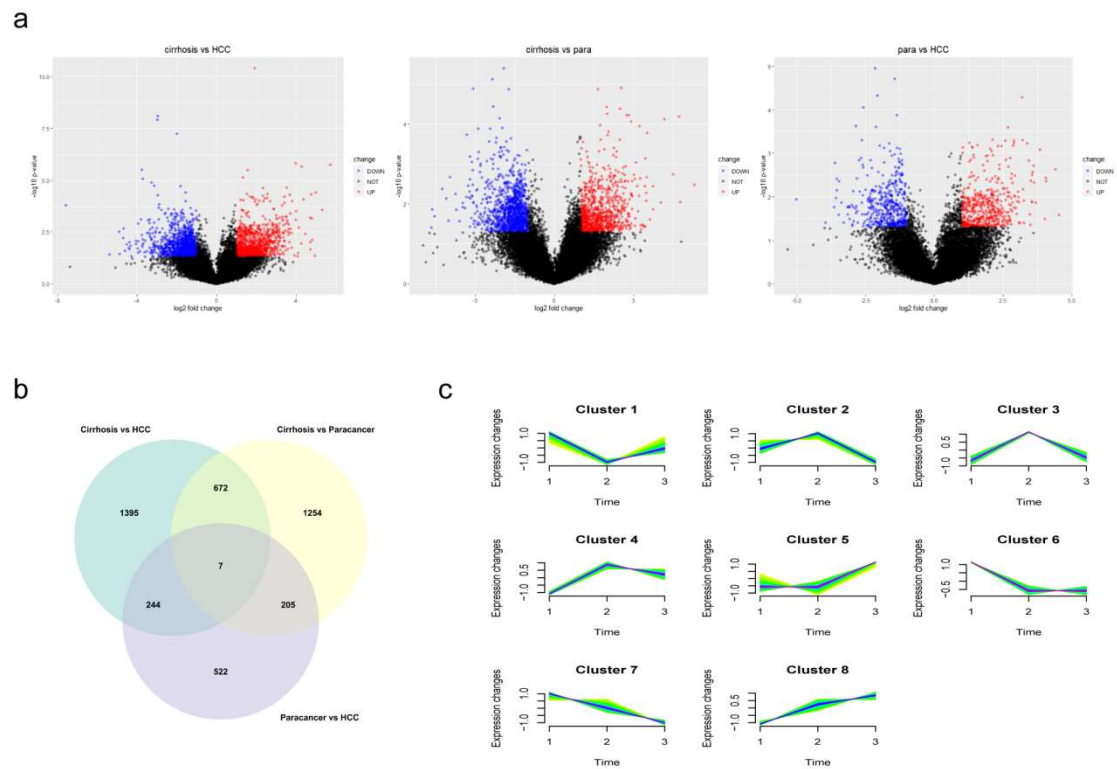

**Figure S2:** Identification of dynamic changing lncRNAs in process of cirrhosis to HCC. **a** Volcano plots revealed the differently expressed lncRNAs between each comparison. **b** Venn diagram revealed overall differently expressed lncRNAs by combining three DEG sets. **c** Mfuzz cluster analysis illustrated the changes in lncRNA expression in the process of HCC development.

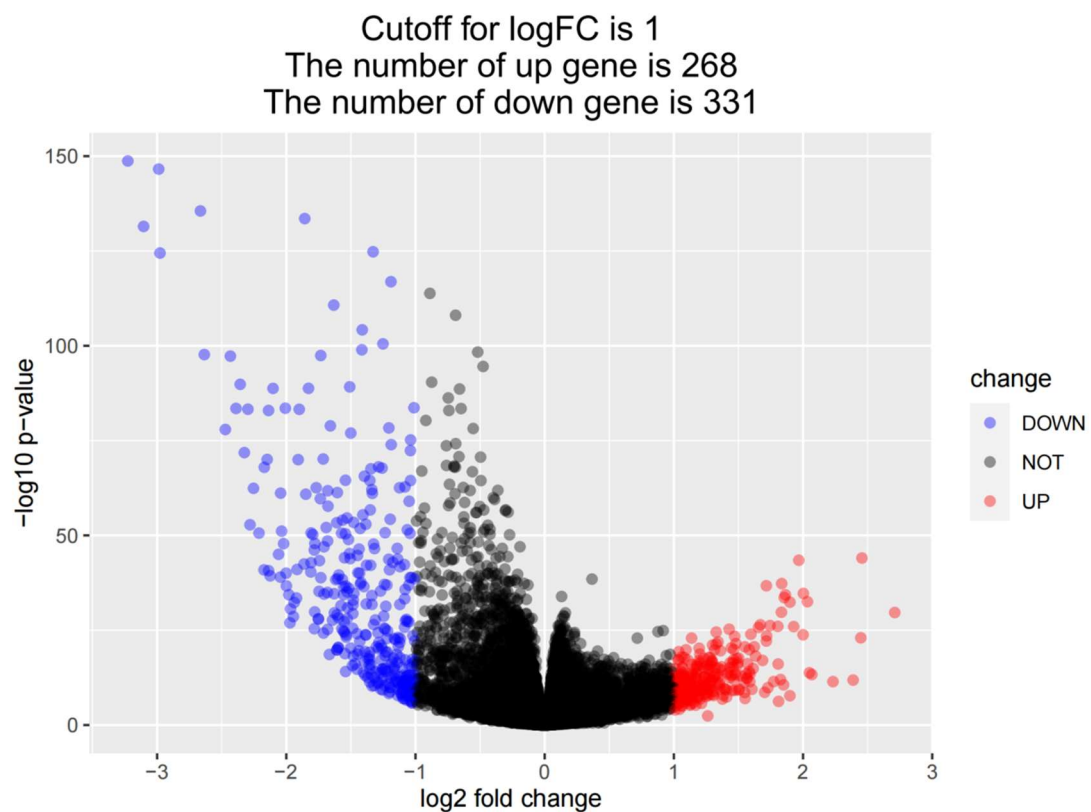

**Figure S3:** Volcano plots revealed the differently expressed mRNAs between paracancerous tissues and HCC tissues in TCGA-LIHC cohort.

**Table S1: List of FAM-related DEGs**

| Symbol    |
|-----------|
| GPD2      |
| ME1       |
| NCAPH2    |
| ACSL4     |
| ALAD      |
| ADH1C     |
| HAO2      |
| ACADL     |
| RDH16     |
| GPD1      |
| HMGCS2    |
| TDO2      |
| ACOX1     |
| MLYCD     |
| GABARAPL1 |
| BCKDHB    |
| ACSL5     |

**Table S2: Correlation between FAM-related genes and lncRNAs**

| mRNA   | lncRNA                | correlation coefficient | p_value     |
|--------|-----------------------|-------------------------|-------------|
| ALAD   | lnc-BCKDHB-3          | 0.912494143             | 1.30988E-07 |
|        | lnc-RP11-210M15.2.1-3 | 0.920863211             | 6.021E-08   |
|        | lnc-DAP-7             | 0.951585195             | 1.30344E-09 |
|        | lnc-DAP-9             | 0.920522339             | 6.2248E-08  |
| GPD2   | lnc-HMOX1-1           | 0.913759357             | 1.17058E-07 |
|        | lnc-RAD23B-4          | 0.938714781             | 8.24748E-09 |
|        | lnc-SIX2-3            | 0.928456681             | 2.75283E-08 |
|        | lnc-SLC25A48-4        | 0.900292195             | 3.57787E-07 |
| HAO2   | lnc-TRPM5-1           | 0.918575589             | 7.50727E-08 |
|        | lnc-CCDC125-6         | 0.921059924             | 5.90604E-08 |
|        | lnc-SCN2A-6           | 0.906332234             | 2.21314E-07 |
|        | lnc-UGDH-3            | 0.919541069             | 6.84524E-08 |
| ACADL  | lnc-AC006156.1-12     | 0.963244891             | 1.49225E-10 |
|        | lnc-AC016757.3.1-1    | 0.968177062             | 4.78608E-11 |
|        | lnc-AC138647.1.1-5    | 0.928851295             | 2.63702E-08 |
|        | lnc-AIFM3-1           | 0.905718611             | 2.3272E-07  |
|        | lnc-ALDH8A1-3         | 0.977856458             | 2.71181E-12 |
|        | lnc-BCL2L10-2         | 0.92231745              | 5.21506E-08 |
|        | lnc-CNTNAP2-4         | 0.906428655             | 2.19567E-07 |
|        | lnc-COL4A2-5          | 0.920037342             | 6.52507E-08 |
|        | lnc-DGKQ-1            | 0.952671149             | 1.09086E-09 |
|        | lnc-DTWD2-3           | 0.945979779             | 3.07595E-09 |
|        | lnc-FGF9-16           | 0.926395017             | 3.43253E-08 |
|        | lnc-GPX6-1            | 0.95964237              | 3.11715E-10 |
|        | lnc-MAP1LC3C-3        | 0.962918839             | 1.59985E-10 |
|        | lnc-MRPL15-1          | 0.906876403             | 2.11607E-07 |
|        | lnc-SERHL2-4          | 0.9194497               | 6.90564E-08 |
|        | lnc-SLC45A4-2         | 0.9496661               | 1.76808E-09 |
| ME1    | lnc-SNX13-1           | 0.956124423             | 6.01588E-10 |
|        | lnc-SORCS2-2          | 0.925270848             | 3.8611E-08  |
|        | lnc-TESK2-1           | 0.913948944             | 1.15086E-07 |
|        | lnc-TMEM106C-7        | 0.967194055             | 6.08601E-11 |
|        | lnc-UNC5CL-5          | 0.903747984             | 2.72856E-07 |
|        | lnc-ZSCAN12-2         | 0.94033027              | 6.69493E-09 |
|        | SNHG25                | 0.929229652             | 2.52996E-08 |
|        | lnc-BCKDHB-3          | 0.931578791             | 1.94579E-08 |
|        | lnc-ARHGAP11B-1       | 0.951145287             | 1.3993E-09  |
|        | lnc-DAP-7             | 0.931414194             | 1.98251E-08 |
| NCAPH2 | lnc-FAM13C-2          | 0.946000444             | 3.06675E-09 |
|        | lnc-FAM173B-6         | 0.906677874             | 2.15105E-07 |

|       |                    |             |             |
|-------|--------------------|-------------|-------------|
|       | lnc-FZD1-2         | 0.922756637 | 4.99084E-08 |
|       | lnc-HMOX1-1        | 0.945729575 | 3.18925E-09 |
|       | lnc-IBA57-2        | 0.922666102 | 5.03636E-08 |
|       | lnc-IBA57-3        | 0.944557078 | 3.76991E-09 |
|       | lnc-KBTBD2-2       | 0.903745065 | 2.7292E-07  |
|       | lnc-KCTD2-1        | 0.914672428 | 1.0782E-07  |
|       | lnc-LARP1-2        | 0.931490148 | 1.96549E-08 |
|       | lnc-PDE4DIP-6      | 0.90217115  | 3.09152E-07 |
|       | lnc-PLD1-1         | 0.902058825 | 3.1189E-07  |
|       | lnc-RAD23B-4       | 0.951497982 | 1.32197E-09 |
|       | lnc-RPSAP58-4      | 0.921373268 | 5.72684E-08 |
|       | lnc-SIX2-3         | 0.967312962 | 5.91397E-11 |
|       | lnc-SLTM-1         | 0.907939772 | 1.93697E-07 |
|       | lnc-TMCO5A-5       | 0.909754794 | 1.66145E-07 |
| PPARA | lnc-OIT3-4         | 0.907896074 | 1.94406E-07 |
|       | lnc-SPRY1-10       | 0.907775651 | 1.96372E-07 |
|       | lnc-AC138647.1.1-5 | 0.936595712 | 1.07519E-08 |
|       | lnc-ALDH8A1-3      | 0.909648463 | 1.6766E-07  |
|       | lnc-DTWD2-3        | 0.900901995 | 3.41326E-07 |
| ACSL4 | lnc-SLC45A4-2      | 0.904138704 | 2.64455E-07 |
|       | lnc-SNRPD2-2       | 0.909200517 | 1.74174E-07 |
|       | lnc-TRA2A-5        | 0.940085899 | 6.91206E-09 |
|       | lnc-ZNF585B-2      | 0.920523073 | 6.22436E-08 |

---
